# Supplementary material for: Stable multi-jet electrospinning with high throughput using the bead structure nozzle
Source: Royal Society of Chemistry journal article supplement (doi:10.1039/c7ra13125a), 2018-01-01
Supplement: c7ra13125a1.pdf [file c7ra13125a1.pdf]

## Stable Multi – jet Electrospinning with High Throughput Using the Bead Structure Nozzle

Yingying Zhang,<sup>a,†</sup> Zhiqiang Cheng,<sup>a,†,\*</sup> Zhaolian Han,<sup>a</sup> Shengzhe Zhao,<sup>a</sup> Xiaodong Zhao,<sup>a</sup> Lijuan Kang<sup>a,\*</sup>

<sup>a</sup> College of Resources and Environment, Jilin Agricultural University, Changchun 130118, People's Republic of China.

\* Corresponding author E-mail: [czq5974@163.com](mailto:czq5974@163.com); [klj410@126.com](mailto:klj410@126.com)

<sup>†</sup> Yingying Zhang and Zhiqiang Cheng contributed to the work equally.

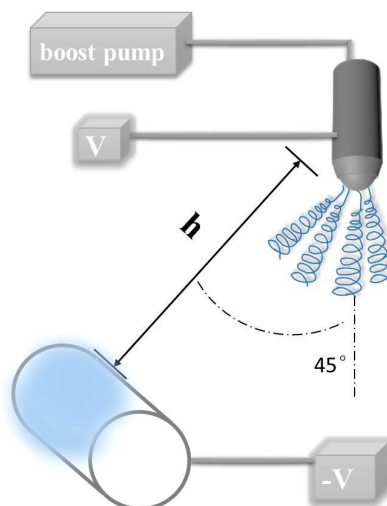

Fig. S1. The schematic of the position of the cylinder receiver

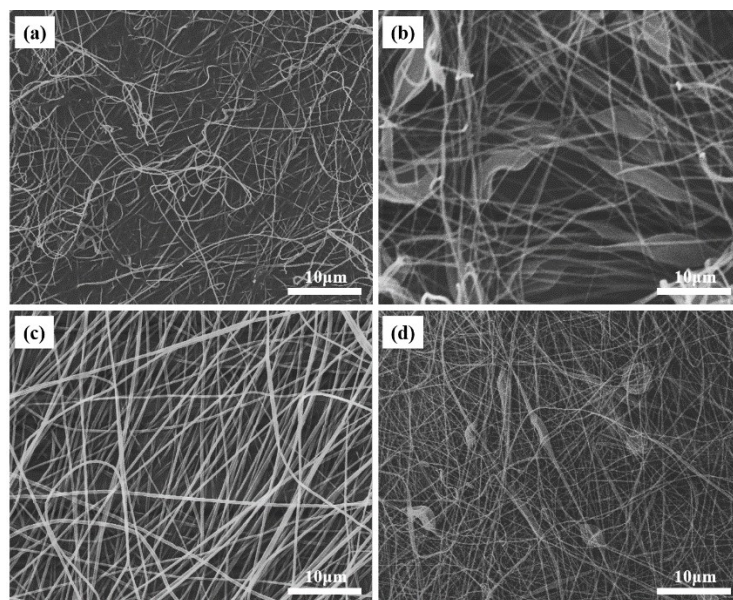

Fig. S2. Scanning electron microscopy micrographs of (a-b) fibers of PVP (3 wt%, the flow rate = 0.3 and 0.6 ml/min, respectively) and (c-d) fibers of PAN (8 wt%, the flow rate = 0.7 and 1.0 ml/min, respectively) with the voltage = 20 KV, the receiving distance = 7 cm
